# Supplementary material for: Developing electropositive citric acid–polyethylenimine carbon quantum dots with high biocompatibility and labeling performance for mesenchymal stem cells in vitro and in vivo
Source: Royal Society of Chemistry journal article supplement (doi:10.1039/d1nj04990a), 2021-12-28
Supplement: d1nj04990a1.pdf [file d1nj04990a1.pdf]

## Supplementary Material (ESI) for *New Journal chemistry*

Developing Electropositive Citric Acid-Polyethylenimine Carbon Quantum Dot for Labeling and Tracing Mesenchymal Stem Cells *in vitro* and *in vivo*

Bo Jiang<sup>a</sup>✉, Hui Yang<sup>b</sup>✉, Ying Guo<sup>c</sup>, Cong Liu<sup>b</sup>, Hua Song<sup>d</sup>, Panpan Zhou<sup>b</sup>, Haiwei Zhang<sup>e</sup>, Kangxin Zhou<sup>a</sup>, Yong Guo<sup>c\*</sup>, Hongwei Chen<sup>a,b\*</sup>

a. *Department of Rheumatology and Immunology, The affiliated Drum Tower Hospital of Nanjing University Medical School, Nanjing, 210008, P.R. China.*

b. *Nanjing Drum Tower Hospital, Clinical College of Traditional Chinese and Western Medicine, Nanjing University of Chinese Medicine, Nanjing, 210008, China.*

c. *Key Laboratory of Integrated Regulation and Resource Development on Shallow Lakes, Ministry of Education, College of Environment, Hohai University, Nanjing, 210098, P.R. China.*

d. *Nanjing Drum Tower Hospital, Clinical College of Nanjing Medical University, Nanjing, 210008, P.R. China.*

e. *Nanjing Drum Tower Hospital Clinical College of Xuzhou Medical University, Nanjing 210008, P.R. China*

✉ The authors made equal contribution to this paper.

\* Corresponding e-mail: chenhw@nju.edu.cn (H.C) or guoyong@hhu.edu.cn (Y.G).

Table. S1 The parameters for calculating the quantum yield of CA-PEI CQD.

| Sample          | Integrated emission intensity (I) | Optical density at 320 nm (A) | Refractive index of the solvent (n) | Quantum yield (%) |
|-----------------|-----------------------------------|-------------------------------|-------------------------------------|-------------------|
| Quinine sulfate | 505524.292                        | 0.048                         | 1.33                                | 55.7%             |
| CA-PEI          | 90454.111                         | 0.048                         | 1.33                                | 9.966%            |

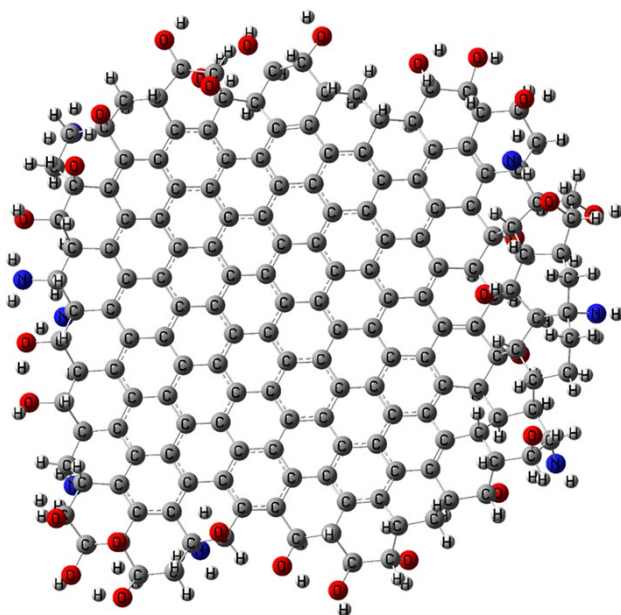

Fig. S1. The optimized CA-PEI CQD model, which contains 170 carbon atoms, 8 nitrogen atoms, 28 oxygen atoms and the edges of CA-PEI CQD model were saturated with hydrogen atoms.

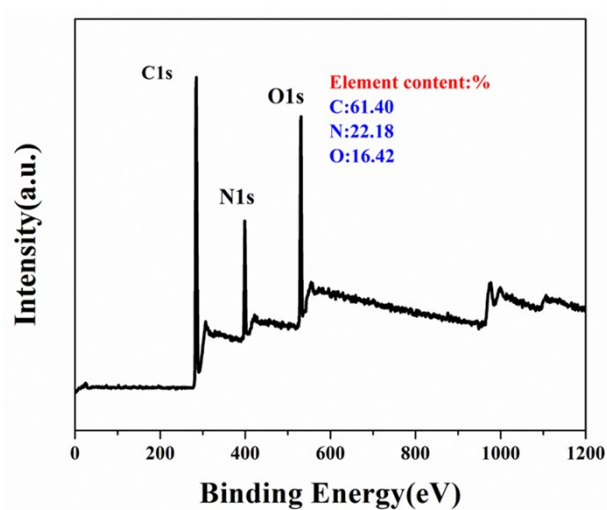

Fig. S2. The full XPS spectra of CA-PEI CQD.

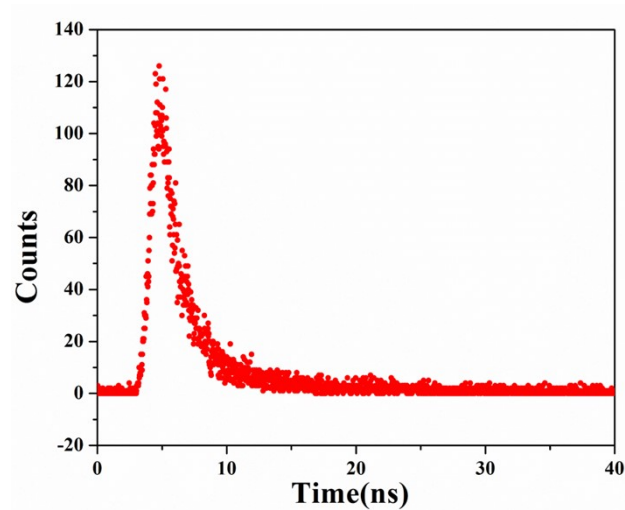

Fig. S3. The fluorescence lifetime decay of CA-PEI CQD

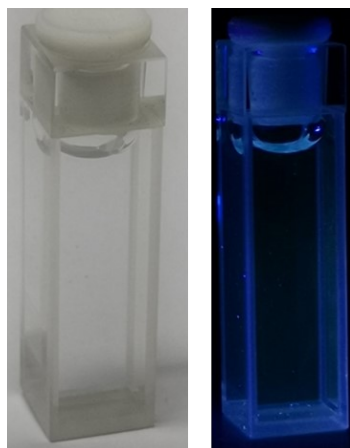

Fig. S4. The image of the deionized water (left) and the image of the deionized water under UV light irradiation (360 nm).

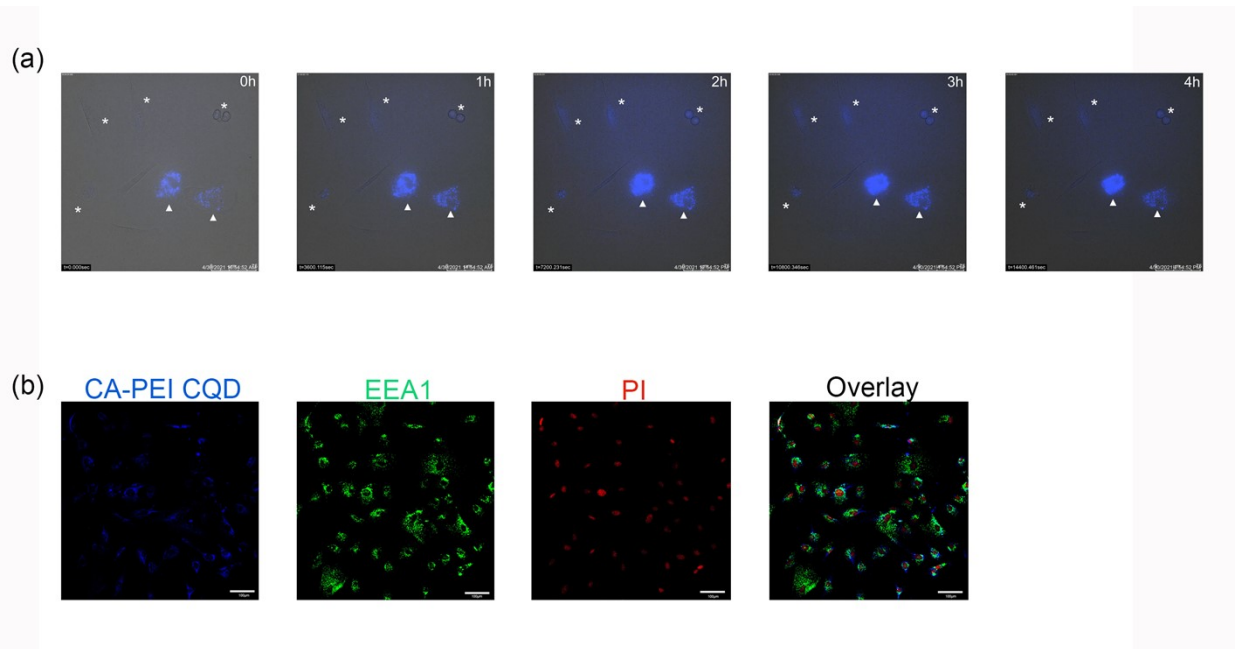

Fig S5. Time-lapse photography shows an active absorption process of CQD from the sender MSCs (triangles) pre-labeled with CA-PEI CQD to unlabeled receiver MSCs (stars). Magnification: x200 (a). Expression of EEA1 (green, early endosome marker) detected by immunofluorescence in the MSCs incubated with 200 µg/ml CA-PEI CQD (blue) for 8 hours (b). Nuclei were stained by propidium iodide (PI). Scale bar: 100 µm.
